# Supplementary material for: Association of Physical Activity from Wearable Devices and Chronic Disease Risk: Insights from the All of Us Research Program
Source: Research Square preprint supplement (doi:10.21203/rs.3.rs-6263507/v1), 2025-05-07
Supplement: Supplementary file 1 [file 519968dd2fad262aa3407e85.docx]

**Association of Physical Activity from Wearable Devices and Chronic Disease Risk: Insights from the All of Us Research Program**

**Yu Hou1,2, Erjia Cui3, Kelvin Lim4, Lisa Chow5, Michael Howell6, Sayeed Ikramuddin2 and Rui Zhang1,2,7**

1Division of Computational Health Sciences, University of Minnesota, Minneapolis, Minnesota, USA

2Department of Surgery, University of Minnesota, Minneapolis, Minnesota, USA

3Division of Biostatistics & Health Data Science, University of Minnesota, Minneapolis, Minnesota, USA

4Department of Psychiatry & Behavioral Sciences, University of Minnesota Medical School, Minneapolis, Minnesota, USA

5Division of Diabetes, Endocrinology and Metabolism, Department of Medicine, University of Minnesota, Minneapolis, Minnesota, USA

6Department of Neurology, University of Minnesota, Minneapolis, Minnesota, USA

7Center for Learning Health System Sciences, University of Minnesota, Minneapolis, Minnesota, USA

**Corresponding Author**: Rui Zhang, PhD, Division of Computational Health Sciences, University of Minnesota, Minneapolis, Minnesota, USA (ruizhang@umn.edu)

# Supplementary Figures


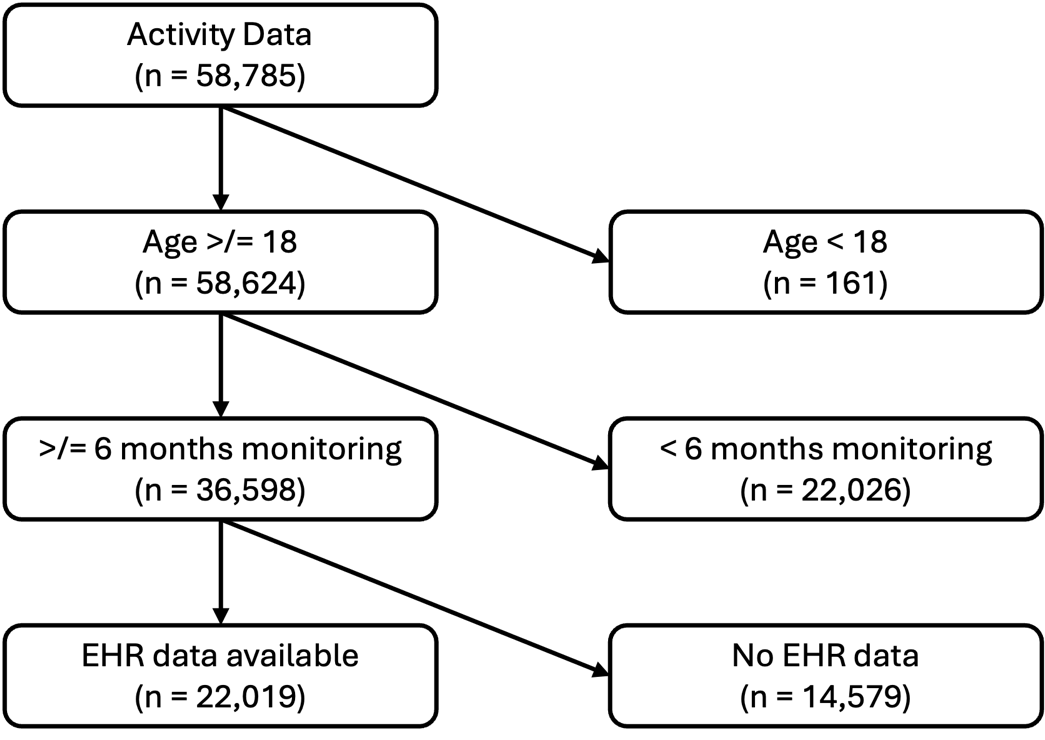


**Supplementary Figure. 1** Inclusion/exclusion cascade of patients in the dataset.


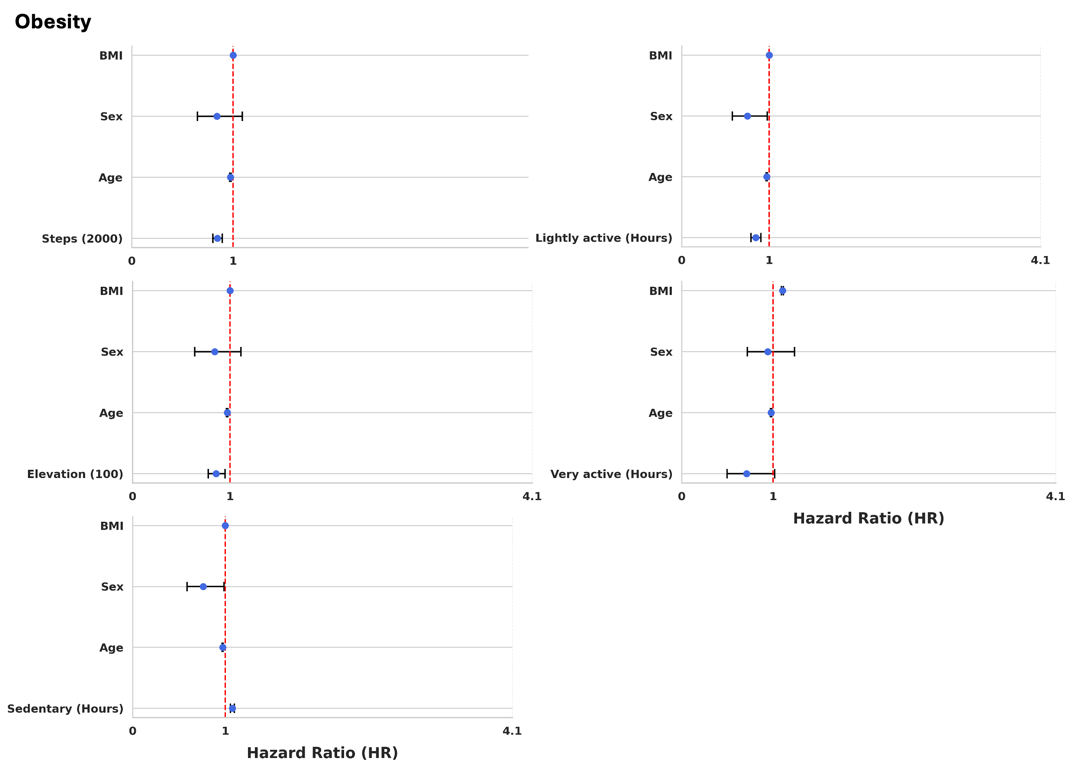


**Supplementary Figure. 2** Forest plots from Cox proportional hazard models for associations between Fitbit activity metric and obesity.


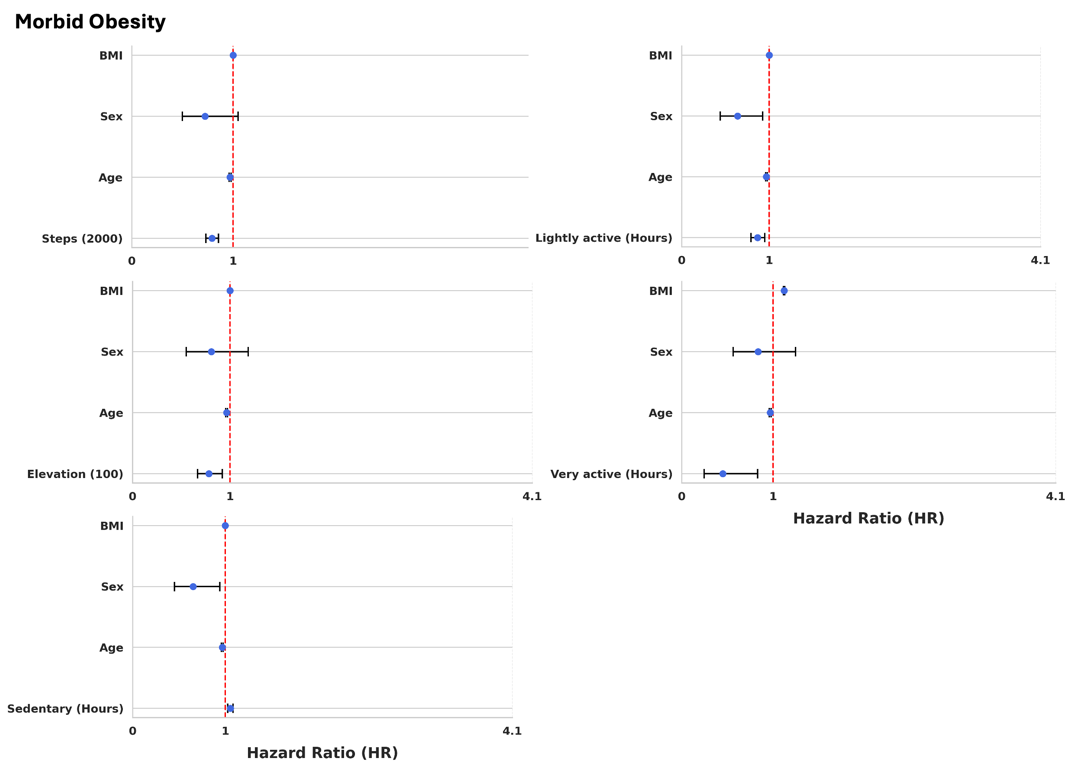


**Supplementary Figure. 3** Forest plots from Cox proportional hazard models for associations between Fitbit activity metric and morbid obesity.


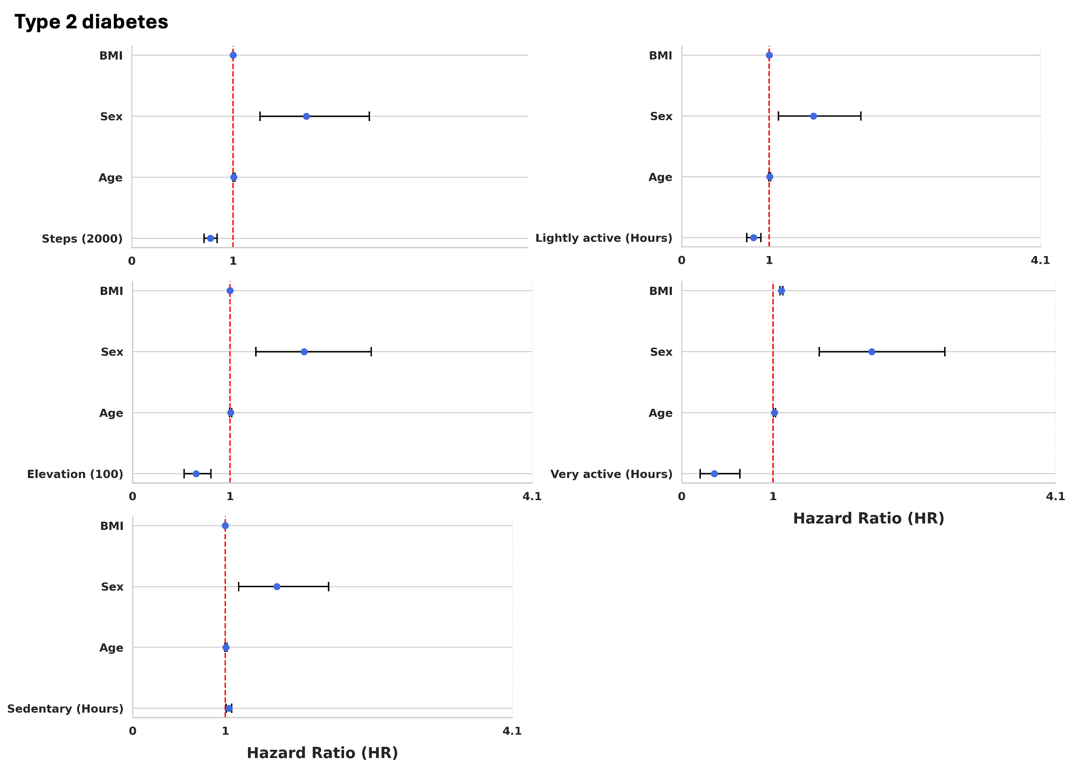


**Supplementary Figure. 4** Forest plots from Cox proportional hazard models for associations between Fitbit activity metric and Type 2 diabetes.


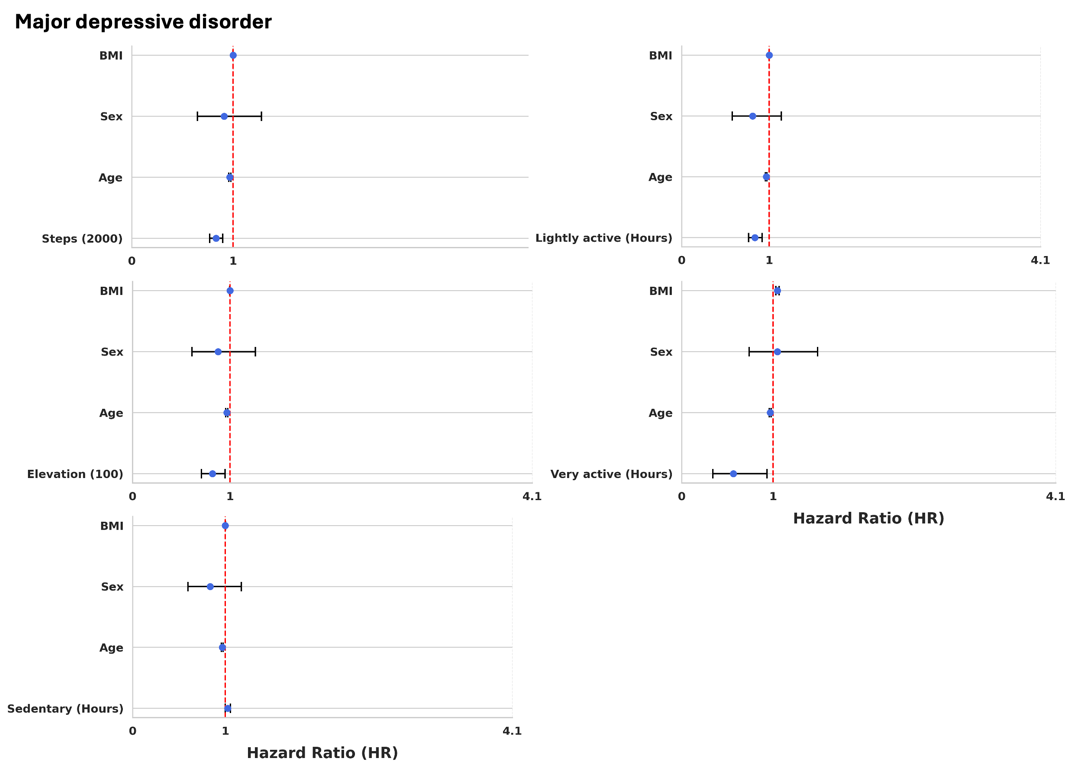


**Supplementary Figure. 5** Forest plots from Cox proportional hazard models for associations between Fitbit activity metric and major depressive disorder.


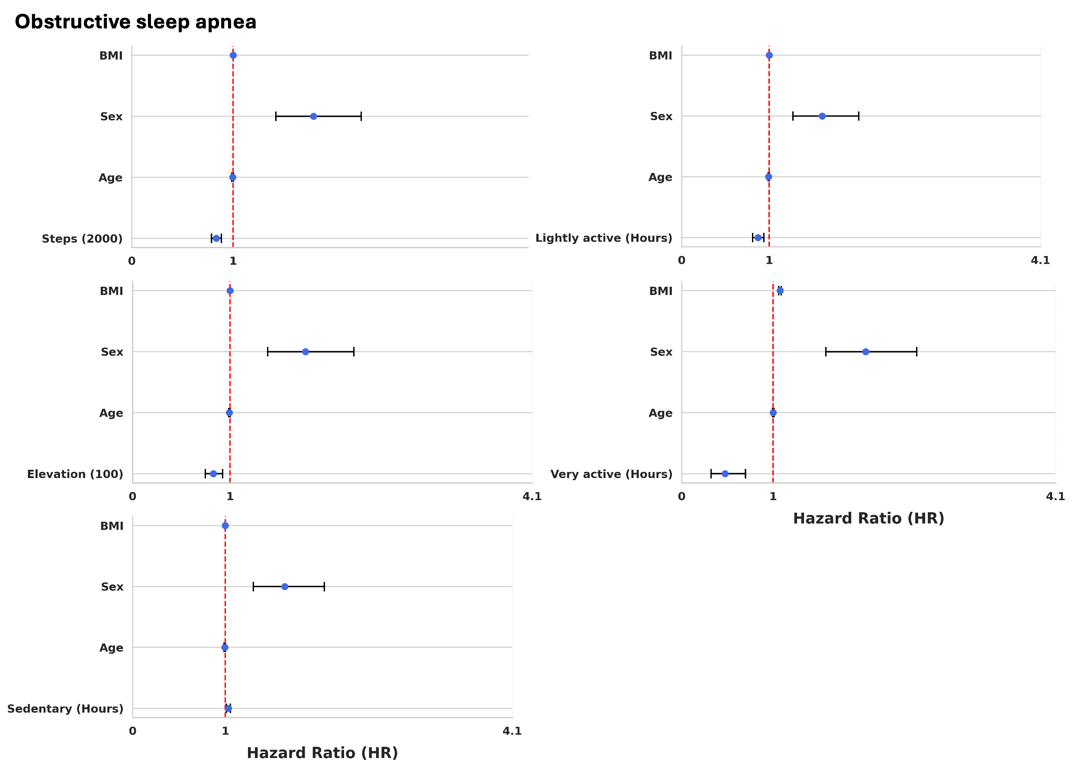


**Supplementary Figure. 6** Forest plots from Cox proportional hazard models for associations between Fitbit activity metric and obstructive sleep apnea.


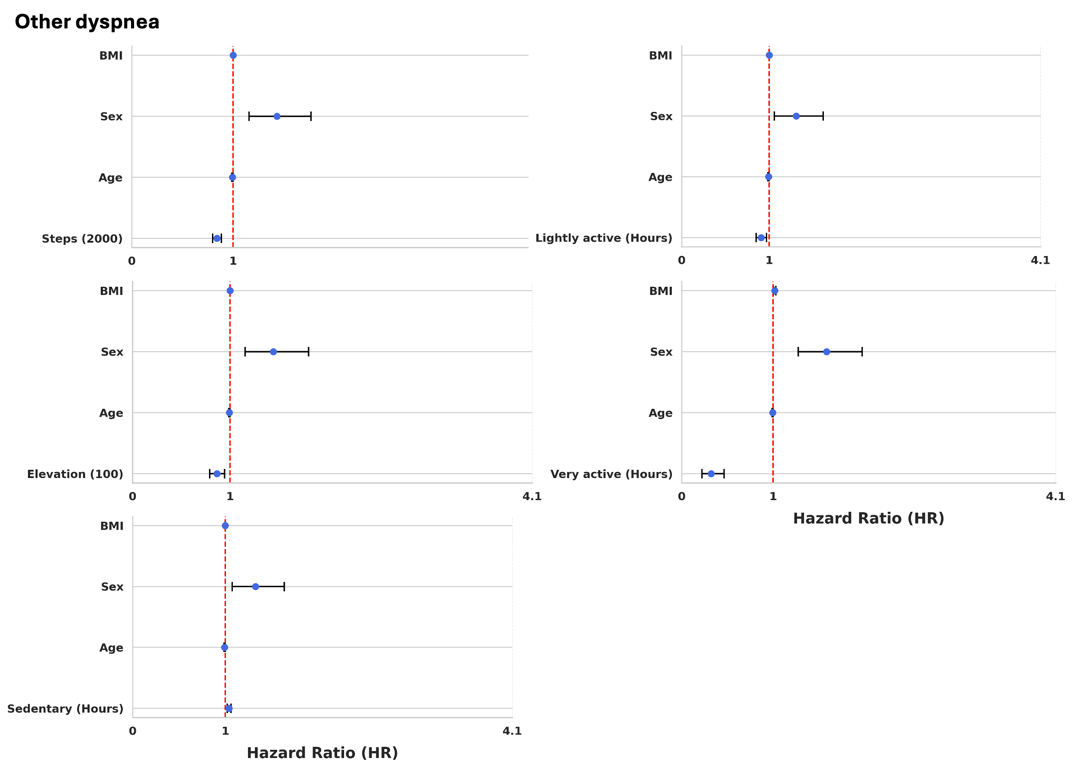


**Supplementary Figure. 7** Forest plots from Cox proportional hazard models for associations between Fitbit activity metric and other dyspnea.


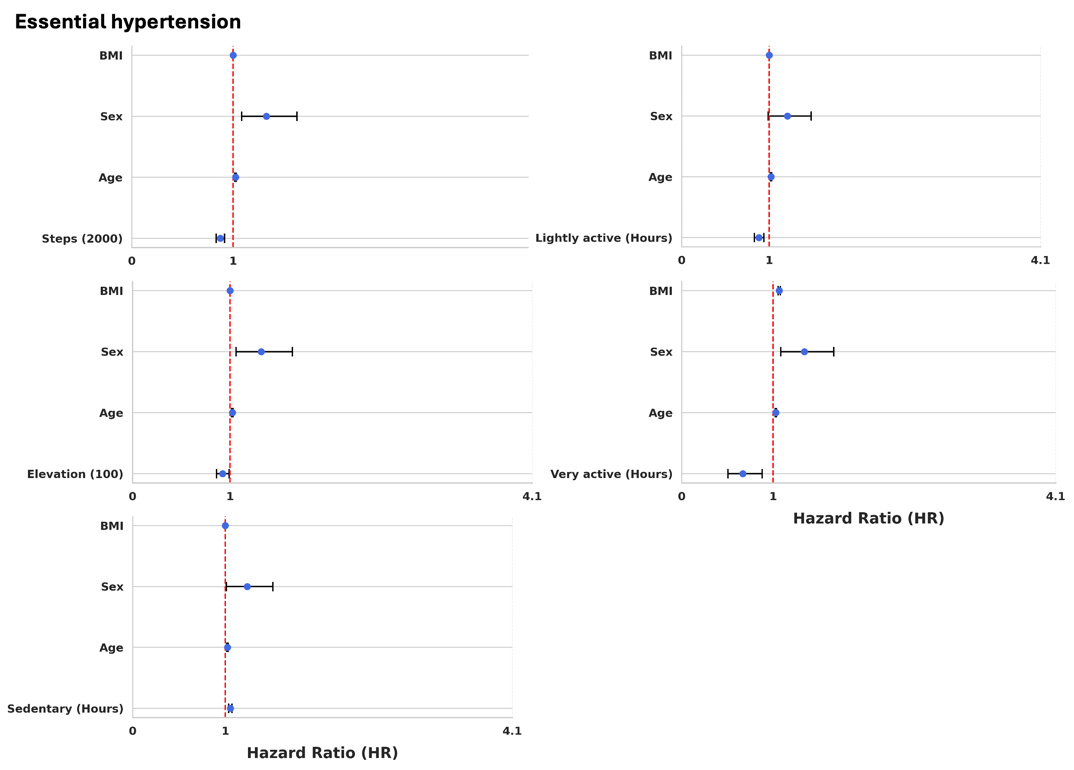


**Supplementary Figure. 8** Forest plots from Cox proportional hazard models for associations between Fitbit activity metric and essential hypertension.


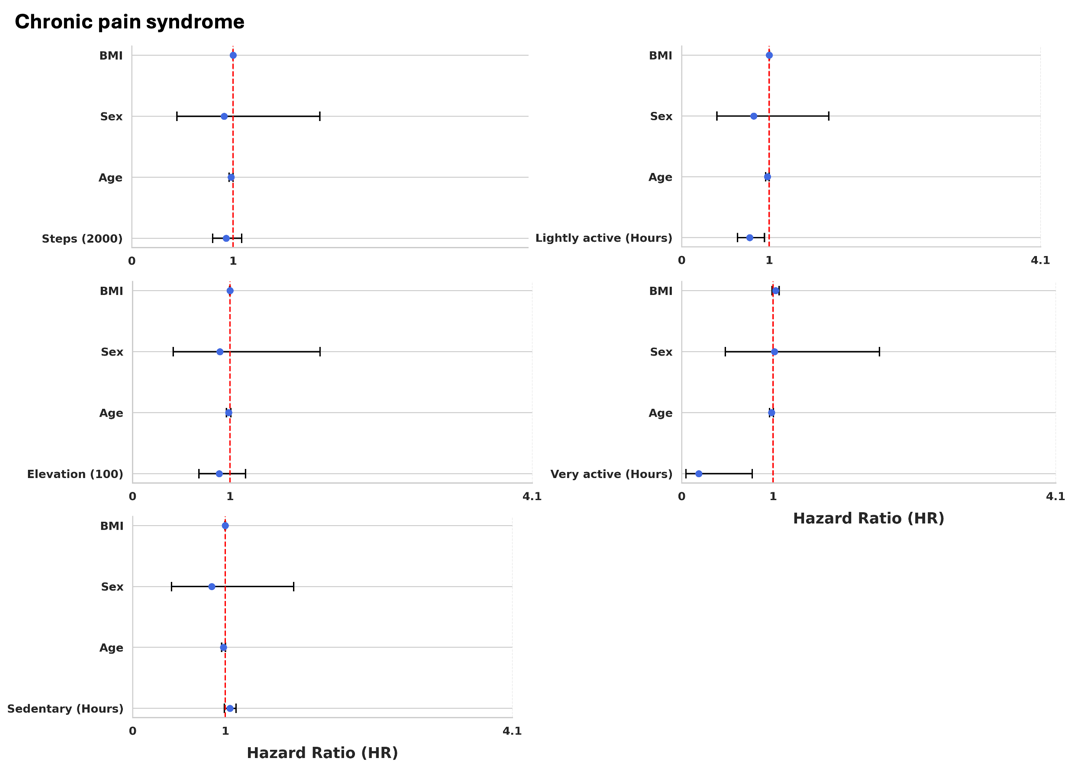


**Supplementary Figure. 9** Forest plots from Cox proportional hazard models for associations between Fitbit activity metric and chronic pain syndrome.


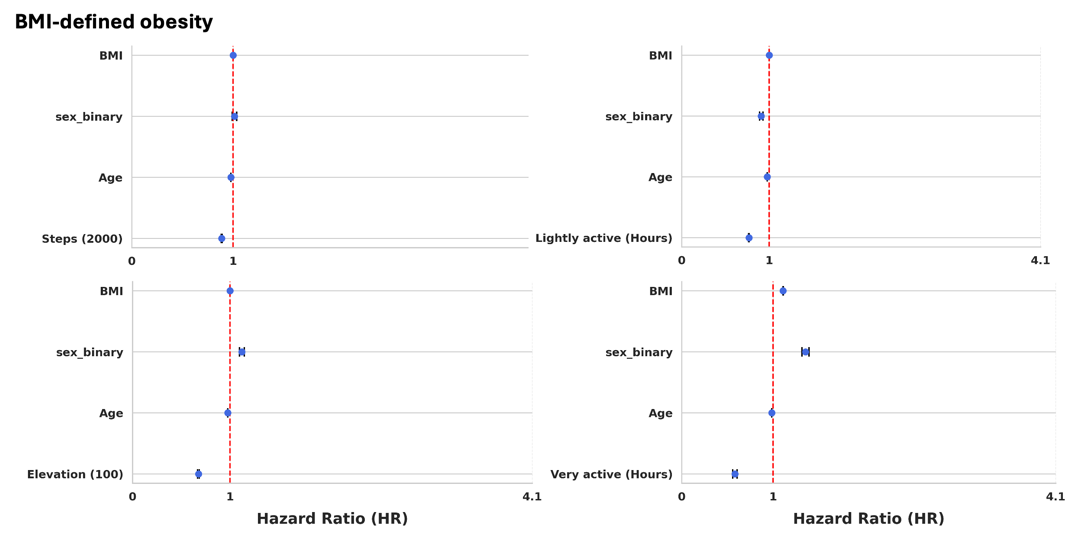


**Supplementary Figure. 10** Forest plots from Cox proportional hazard models for associations between Fitbit activity metric and BMI-defined obesity.
